# Supplementary material for: In Vitro Assembly and Stabilization of Dengue and Zika Virus Envelope Protein Homo-Dimers
Source: PubMed Central journal article supplement (PMC5495877; doi:10.1038/s41598-017-04767-6), 2017-07-03
Supplement: 41598_2017_4767_MOESM1_ESM.pdf [file 41598_2017_4767_MOESM1_ESM.pdf]

## Supplementary information.

### ***In Vitro* Assembly and Stabilization of Dengue and Zika Virus Envelope Protein Homo-Dimers**

Stefan W.Metz<sup>1\*</sup>, Emily N.Gallichotte<sup>1,3</sup>, Alex Brackbill<sup>2</sup>, Lakshmanane Premkumar<sup>1</sup>, Michael J. Miley<sup>2</sup>, Ralph Baric<sup>1,3</sup>, Aravinda M. de Silva<sup>1\*</sup>.

1: Department of Microbiology and Immunology, University of North Carolina School of Medicine, Chapel Hill, NC, USA

2: Department of Pharmacology, University of North Carolina School of Medicine, Chapel Hill, NC, USA

3: Department of Epidemiology, University of North Carolina School of Public Health, Chapel Hill, NC, USA

\*: Corresponding authors

Stefan Metz: [swmetz@med.unc.edu](mailto:swmetz@med.unc.edu)

Aravinda de Silva: [aravinda\\_desilva@med.unc.edu](mailto:aravinda_desilva@med.unc.edu)

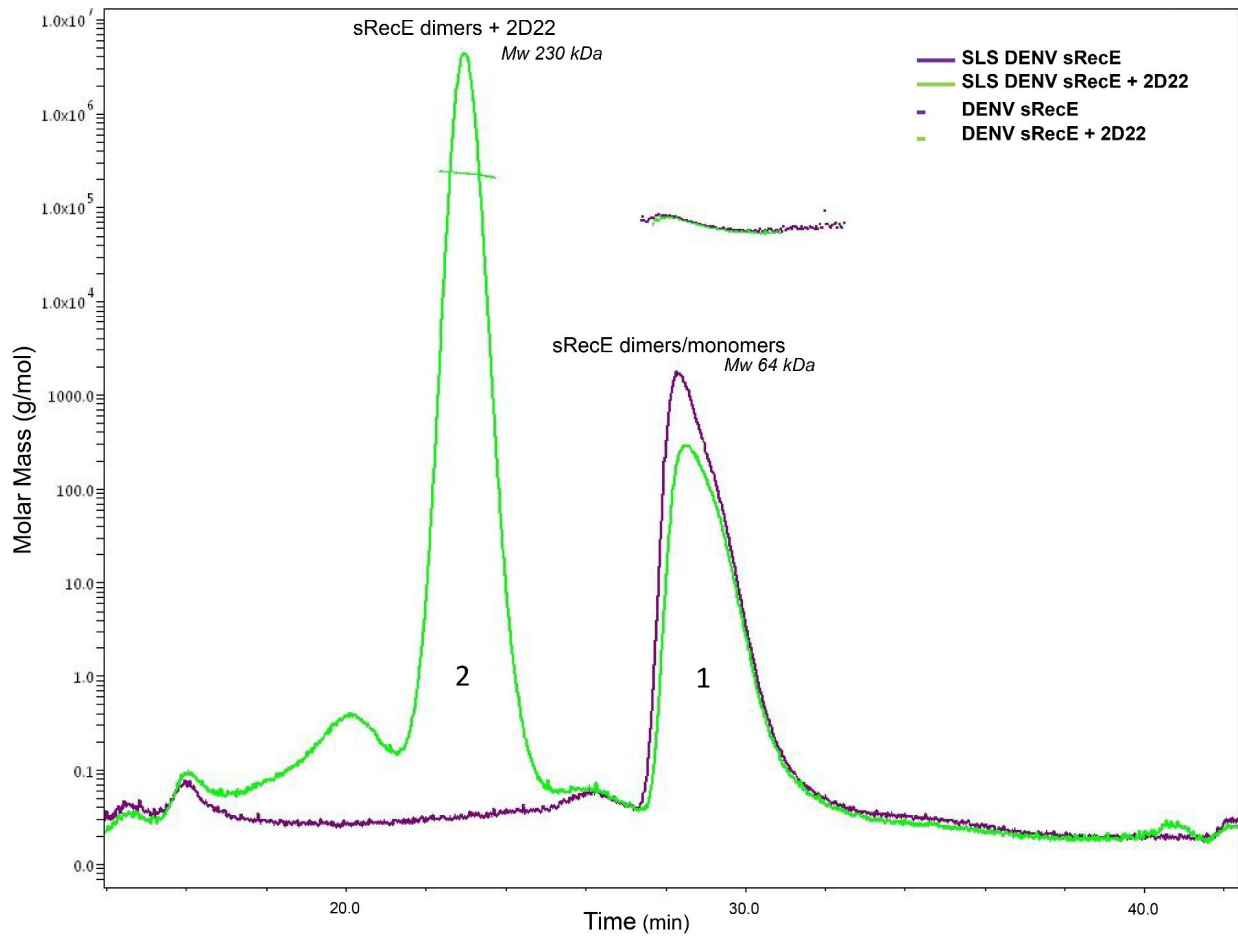

**Supplement Figure 1: DENV sRecE oligomeric state analysis.**

The oligomeric state of 200  $\mu\text{g}$  of DENV2 sRecE with (green) or without (purple line) 40  $\mu\text{g}$  of 2D22 in 100  $\mu\text{l}$  PBS were analyzed by static light scattering (SLS) after size exclusion chromatography. Peak 1 represents the sRecE dimer/monomer equilibrium, with an average calculated molecular weight ( $M_w$ ) of 64 kDa. The second peak represents sRecE dimers in association with the 2D22 mAb and has a predicted  $M_w$  of 230 kDa. The purple (sRecE) and green (sRecE + 2D22) dotted lines represent the calculated molar mass of the protein fractions.
